# Supplementary material
Source: PubMed Central journal article supplement (PMC5016669)
Supplement: 10.1074_M116.740324_jbc.M116.740324-1.pdf [file 10.1074_M116.740324_jbc.M116.740324-1.pdf]

## TTF-1 regulates PFP thyroid cell adipogenic differentiation

**Supplemental Table 1. Over represented transcription factor matrices in PFP peaks (300 bp), identified by Genomatix.**

| TF Matrices | Expected<br>(promoters) | Std.dev. | Over representation<br>(promoters) | Z-Score<br>(promoters) |
|-------------|-------------------------|----------|------------------------------------|------------------------|
| V\$GAGA.01  | 1277.42                 | 35.72    | 1.77                               | 27.38                  |
| V\$NKX25.01 | 119.16                  | 10.92    | 3.42                               | 26.42                  |
| V\$NKX22.01 | 137.4                   | 11.72    | 3.22                               | 25.94                  |
| V\$NKX24.01 | 194.16                  | 13.93    | 2.71                               | 23.85                  |
| V\$TTF1.02  | 184.47                  | 13.58    | 2.66                               | 22.46                  |
| V\$NF1.01   | 264.01                  | 16.25    | 2.35                               | 21.88                  |
| V\$NKX25.04 | 222.85                  | 14.93    | 2.44                               | 21.42                  |
| V\$NKX26.01 | 341.55                  | 18.48    | 2.13                               | 20.78                  |
| V\$NKX31.03 | 536.02                  | 23.15    | 1.86                               | 19.81                  |
| V\$AP1.02   | 596.49                  | 24.42    | 1.8                                | 19.58                  |

| TF Matrices       | Expected<br>(genome) | Std.dev. | Over<br>representation<br>(genome) | Z-Score<br>(genome) |
|-------------------|----------------------|----------|------------------------------------|---------------------|
| V\$NF1.02         | 155.01               | 12.45    | 2.94                               | 24.06               |
| V\$NF1.01         | 246.41               | 15.7     | 2.52                               | 23.77               |
| V\$NKX22.01       | 159.24               | 12.62    | 2.78                               | 22.37               |
| V\$NF1.04         | 158.67               | 12.6     | 2.7                                | 21.42               |
| V\$NKX25.01       | 149.11               | 12.21    | 2.74                               | 21.16               |
| V\$LACTOFERRIN.01 | 369.18               | 19.21    | 2.07                               | 20.53               |
| V\$NKX24.01       | 232.54               | 15.25    | 2.27                               | 19.28               |
| V\$NKX25.05       | 659.2                | 25.67    | 1.71                               | 18.13               |
| V\$TTF1.02        | 238.63               | 15.45    | 2.05                               | 16.24               |
| V\$TTF1.01        | 35.59                | 5.97     | 3.71                               | 16.08               |
