# Supplementary material
Source: PubMed Central journal article supplement (PMC5016669)
Supplement: 10.1074_M116.740324_jbc.M116.740324-2.pdf [file 10.1074_M116.740324_jbc.M116.740324-2.pdf]

**TTF-1 regulates PFP thyroid cell adipogenic differentiation**

**Supplemental Table 2, Primers for mRNA expression in Real-time qPCR**

| Gene     | Forward primer           | Reverse Primer            |
|----------|--------------------------|---------------------------|
| mFabp4   | TGGAAGCTTGTCTCCAGTGA     | AATCCCCATTTACGCTGATG      |
| mPlin1   | GCTCTTCAATACCCTCCAGAAAAG | TTCGAAGGCGGGTAGAGATG      |
| mCd36    | GAACAGCAGCAAAATCAAGG     | AAGACACAGTGTGGTCCTC       |
| mLpl     | CTAACTGCCACTTCAACCACAGC  | CACCCAACTCTCATACATTCC CG  |
| hPPFP    | CGGACAGGGCAGCTATGC       | GCATCTCTGTGTCAACCATGGT    |
| rTg      | AGAAGGGGTGCCAACAAACA     | AGCCAAGACCGACTTTCCTG      |
| rDuoxa2  | TTGTCCTTGGCTGCTAGCTT     | ACTCTCACCAACCAGAACCAG     |
| rPlin1   | GATTCTGCTTTGCAGCGTGAAG   | CTGGAGCACATTCTCCTGTTC     |
| rCrat    | CCCAGTGTCCGCAAACAGAT     | CCTTCATCAAGGAGGAGGGC      |
| rCdk2    | GGCTGCATCTTTGCCGAAAT     | CCCAGAGTCCGAAAGATCCG      |
| rCidec   | GAACGTGAAGGCAACCCTCT     | AGAGTCCAGCGGAGCATTTC      |
| rFgf21   | TGCCAACAAACCAGATGGAAC    | AAGCAGCAGCTCTCTGAAACT     |
| rAcadm   | ATGTGGATAACCAACGGGGG     | GGATCTGGGTTAGATCGCGT      |
| rRacgap1 | GAACAGGGTTGCGTGTGC       | AGATTCACCATTGTAGTATCCATCT |
| rCol7a1  | GTCTTGGAACCCAGTCCCTCG    | CAGGAAGCAACAAAGTCCGC      |
| rCes2g   | GAATGCTGTGCTCTTTGGGC     | GGAATCTGGTGAGTGCTGTC      |
| rMertk   | CAGTGAGCCAGTGGACGTAG     | GGGTTGATGAGGGTGCGTAA      |
| rSlc16a6 | TTGGGAGCCTTTTGGGGTTT     | CATTGGCCCTGGAACAAAGC      |
| rGrpel2  | GAGACGGACCCAGAGATGTG     | TACCTCCACGAGGTCCTTACA     |
| rLgals1  | TGTCTCAAAGTTCGGGGAGAG    | TAGGCACAGGTTGTTGCTGT      |
| rKpna2   | TGCCGGGCTTAACAGATTCA     | CATTAACCTCTATTGCGCGGC     |
| rAbcf1   | CCCGAATTTGCATTGTGGGT     | TCTTCCTCATTTCCTCGTTGG     |
| rEch1    | CAGAGATGGCTACCGCGATG     | TGAAGTACAGCTGGCGGGTA      |
| rAqp7    | CAGAGGGGCTGTGAGACAAG     | AGAACCGGCCATTGTGGAAT      |
| rDdx52   | GCAGACGCTACTCGATTCCA     | AGTCCCTTACGGTCTCTGA       |
| rPlin2   | CAAAAGGGCCAGGAGACCAT     | TGCACATTCTCCTGGCGAA       |
| rFabp4   | TTCCTTCAAACCTGGGCGTGG    | CCCCACCATCCAGGGTTATG      |
| rDgat2   | CGTGTGGCGCTATTTTCGAG     | GGTCAGCAGGTTGTGTGTCT      |
