# Supplementary material
Source: PubMed Central journal article supplement (PMC5016669)
Supplement: 10.1074_M116.740324_jbc.M116.740324-3.pdf [file 10.1074_M116.740324_jbc.M116.740324-3.pdf]

**TTF-1 regulates PFP thyroid cell adipogenic differentiation**

**Supplemental Table 3, ChIP Primers for Real-time qPCR**

| Gene    | Forward primer           | Reverse Primer         |
|---------|--------------------------|------------------------|
| rHprt   | GATCTCAATTGTCTGGTAGGTTGA | GCCCAGCTACCAGGAAAGG    |
| rAsh1L  | ACGGGAAAGTAAGCGAGTGC     | GCTCCAATCGGGCCTACTAC   |
| rChfr   | GTCCACCTTATTTTGCAAGGAGG  | AACTGTATCACCTAGGCCCTCT |
| rlreb2  | ACTCGAACTACACCGGCAAG     | CAGGGGTGAGAGTGAGGAGA   |
| rCidec  | CACTGAGCCGAGAAGCTGAA     | CAGCGTGAAGTGGA CTCTGT  |
| rCes2g  | GAGCTCCTGCATTTGCCCTA     | GGCAGGAAGCTGTAACAGGA   |
| rGrpel2 | CTTCAGACCTGTGGCACACT     | TGAGCACAGCCACTAAAGCA   |
| rSlc16a | ACATGCCAGCTTCTATGGCA     | TCGACTGCATTCTCCCAAC    |
| rDdx52  | TCCTCTCCACTTTTATTGGCGAT  | TCGACAATGTCCAGCTGACTC  |
| rDuoxa2 | TCCGCAGTCCCTCTCCTTTA     | GCAGACAGGGGTCAACTCTC   |
| rPlin1  | CTGAGCTGCTGCTGTCTTCT     | GAGAGGCCACTTTACACGCT   |
| rCrat   | CCCAGTGTCCGCAAACAGAT     | CGTACTCACCACGGTTCTGG   |
| rEch1   | CGCAGCGTTGTGATGA ACTT    | GTGGGAAGCTTGCCTGAGAA   |
| rKpn2   | AGCTCCCTCCTTATGCCTGA     | TTGTCTATGTGGGGGAGGGT   |
| rLgals  | TGCATTTGCACACACAGAC      | GTTTCTTTGACATTTGAACCCC |
